# Supplementary material for: A Web-Based Dynamic Nomogram to Predict the Risk of Methicillin-Resistant Staphylococcal Infection in Patients with Pneumonia
Source: MDPI journal article supplement (doi:10.3390/diagnostics14060633), 2024-03-16
Supplement: s1 [file s1]

**Table S1. Clinical attributes of our predictive model.**

|                      |          | MRS infection |          |
|----------------------|----------|---------------|----------|
|                      |          | Positive      | Negative |
| Our predictive model | Positive | 85            | 91       |
|                      | Negative | 7             | 24       |

MRS—Methicillin-resistant *Staphylococcus* spp.
